# Supplementary material for: Co9S8@N,P-doped porous carbon electrocatalyst using biomass-derived carbon nanodots as a precursor for overall water splitting in alkaline media
Source: Royal Society of Chemistry journal article supplement (doi:10.1039/c7ra01798g), 2017-01-01
Supplement: c7ra01798g1.pdf [file c7ra01798g1.pdf]

## Electronic Supplementary Information

### **Co<sub>9</sub>S<sub>8</sub>@N, P-doped porous carbon electrocatalyst using biomass-derived carbon nanodots as precursor for overall water splitting in alkaline media**

Rongrong Liu,<sup>a,b</sup> Haimin Zhang,<sup>\*a</sup> Xian Zhang,<sup>a,b</sup> Tianxing Wu,<sup>a</sup> Huijun Zhao<sup>a,c</sup> and Guozhong Wang<sup>\*a</sup>

---

<sup>a</sup>Key Laboratory of Materials Physics, Centre for Environmental and Energy Nanomaterials, Anhui Key Laboratory of Nanomaterials and Nanotechnology, CAS Center for Excellence in Nanoscience, Institute of Solid State Physics, Chinese Academy of Sciences, Hefei 230031, China. Email: [zhanghm@issp.ac.cn](mailto:zhanghm@issp.ac.cn); [gzhwang@issp.ac.cn](mailto:gzhwang@issp.ac.cn); Tel: +86 551 65591973.

<sup>b</sup>University of Science and Technology of China, Hefei 230026, China.

<sup>c</sup>Centre for Clean Environment and Energy, Griffith University, Gold Coast Campus, QLD 4222, Australia.

**Table S1** The content of different doped nitrogen species on the sample surface obtained by XPS.

| Sample                                 | N<br>(at.%) | Pyridinic<br>N (%) | Pyrrolic N<br>(%) | Graphitic N<br>(%) | Oxidized<br>N (%) |
|----------------------------------------|-------------|--------------------|-------------------|--------------------|-------------------|
| Co <sub>9</sub> S <sub>8</sub> @NC     | 5.74        | 36.57              | 22.67             | 26.13              | 14.63             |
| Co <sub>9</sub> S <sub>8</sub> @NPC-5  | 4.38        | 28.06              | 21.68             | 31.33              | 18.93             |
| Co <sub>9</sub> S <sub>8</sub> @NPC-10 | 4.31        | 20.38              | 27.10             | 41.37              | 11.15             |
| Co <sub>9</sub> S <sub>8</sub> @NPC-15 | 4.28        | 19.27              | 18.41             | 28.12              | 34.20             |

**Table S2** The comparison of the HER performances between the fabricated catalysts in this work and other Co<sub>9</sub>S<sub>8</sub>-based electrocatalysts in literatures.

|                                     | Onset<br>potential (mV) | $\eta_j^a$ (mV) | pH              | Tafel<br>(mV/dec) | Ref.      |
|-------------------------------------|-------------------------|-----------------|-----------------|-------------------|-----------|
| Co <sub>9</sub> S <sub>8</sub> NT   |                         | $\eta_{20}=320$ | 14 <sup>b</sup> | 135               | 1         |
| Co <sub>9</sub> S <sub>8</sub> @C   | -150                    | $\eta_{10}=280$ | 7 <sup>c</sup>  |                   | 2         |
| Co <sub>9</sub> S <sub>8</sub> /CC  | -25                     | $\eta_{10}=175$ | 7               |                   | 3         |
| Co <sub>9</sub> S <sub>8</sub>      | -224                    | $\eta_7=270$    | 0 <sup>d</sup>  | 135               | 4         |
| Co <sub>9</sub> S <sub>8</sub> @NPC | -150                    | $\eta_{10}=261$ | 14              | 101.8             | This work |

<sup>a</sup> The overpotential ( $\eta$ ) at the current density ( $j$ ); <sup>b</sup> 1.0 M KOH (pH=14); <sup>c</sup> 1.0 M phosphate buffer (pH=7.0) ; <sup>d</sup> 0.5 M H<sub>2</sub>SO<sub>4</sub> (pH=0).

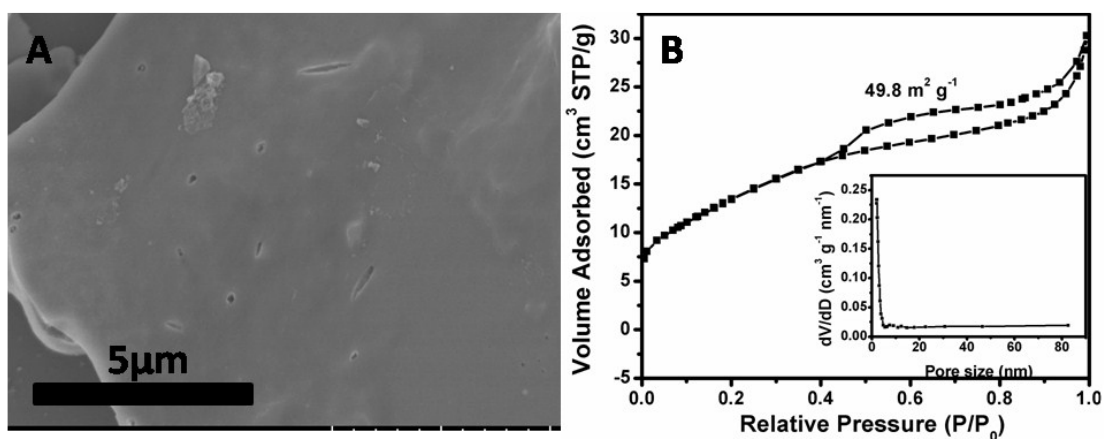

**Fig. S1** (A) SEM image of  $\text{Co}_9\text{S}_8@\text{NPC-10}$  without NaCl-KCl, (B)  $\text{N}_2$  adsorption-desorption isotherm of  $\text{Co}_9\text{S}_8@\text{NPC-10}$  without NaCl-KCl and corresponding pore size distribution.

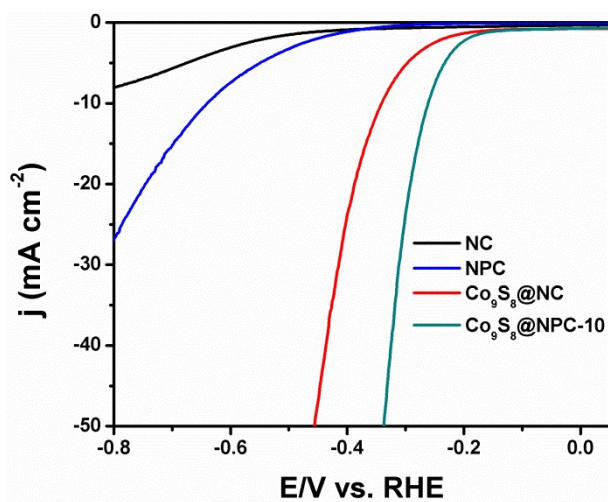

**Fig. S2** HER polarization curves of NC, NPC,  $\text{Co}_9\text{S}_8@\text{NC}$  and  $\text{Co}_9\text{S}_8@\text{NPC-10}$  electrocatalysts at a scan rate of  $5.0 \text{ mV s}^{-1}$  in  $1.0 \text{ M KOH}$  electrolyte.

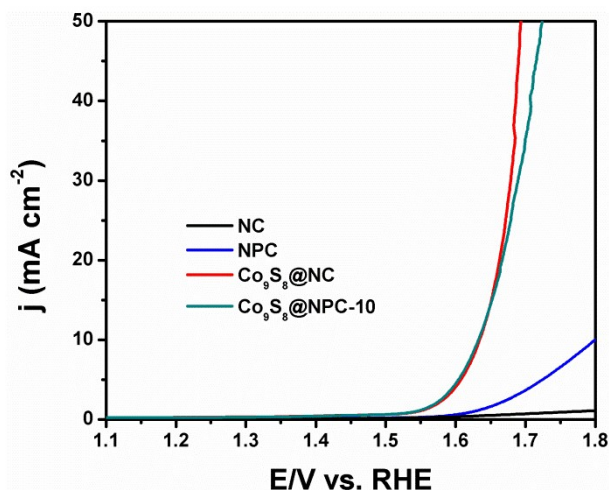

**Fig. S3** OER polarization curves of NC, NPC,  $\text{Co}_9\text{S}_8@\text{NC}$  and  $\text{Co}_9\text{S}_8@\text{NPC-10}$  electrocatalysts at a scan rate of  $5.0 \text{ mV s}^{-1}$  in  $1.0 \text{ M KOH}$  electrolyte.

## References

1. L. Jin, C. Lv, J. Wang, H. Xia, Y. Zhao and Z. Huang, *Am. J. Anal. Chem.*, 2016, 07, 210-218.
2. L. L. Feng, G. D. Li, Y. Liu, Y. Wu, H. Chen, Y. Wang, Y. C. Zou, D. Wang and X. Zou, *ACS Appl. Mater. Interf.*, 2015, 7, 980-988.
3. L.-L. Feng, M. Fan, Y. Wu, Y. Liu, G.-D. Li, H. Chen, W. Chen, D. Wang and X. Zou, *J. Mater. Chem. A*, 2016, 4, 6860-6867.
4. Y. Pan, Y. Liu and C. Liu, *Appl. Surf. Sci.*, 2015, 357, 1133-1140.
